# Supplementary material
Source: PubMed Central journal article supplement (PMC3351833)

## Supplementary Figures

**Figure S1. Monitoring CaM-Cx50<sub>141-166</sub> complex formation by mass spectroscopy.** The MALDI-MS spectra of the free form of CaM (~17 kDa) and the complex form of CaM-Cx50<sub>141-166</sub> (~20 kDa). The inset showed the molecular weight of the Cx50<sub>141-166</sub> peptide.

**Figure S2. Monitoring the interaction between Apo-CaM and Cx50 peptides by (<sup>1</sup>H, <sup>15</sup>N)-HSQC spectroscopy.** An overlay of HSQC spectra of apo-CaM (red) with the spectrum of the apo-CaM-Cx50<sub>141-166</sub> (green).

**Figure S3. The dansyl fluorescence anisotropy.** D-CaM (1 μM) was titrated with Cx50<sub>141-166</sub> in 100mM KCl, 5mM CaCl<sub>2</sub>, 50mM Tris-HCl at pH 7.5. The fluorescence anisotropy were measured at λ<sub>ex</sub> = 335 nm and λ<sub>em</sub> = 495 nm with an integration time of 20s. The inset shows the anisotropy change for D-CaM (free), and the complex of D-CaM-Cx50p (bound).

**Figure S4. Comparison of the α family of connexins.** An overlay of the HSQC spectra of holo-CaM (yellow), holo-CaM-Cx50p (green), and holo-CaM-Cx43p (violet). Arrows indicated that most signals shifted to the same direction due to identical binding mode, while rectangles highlighted some exceptions.

Figure S1

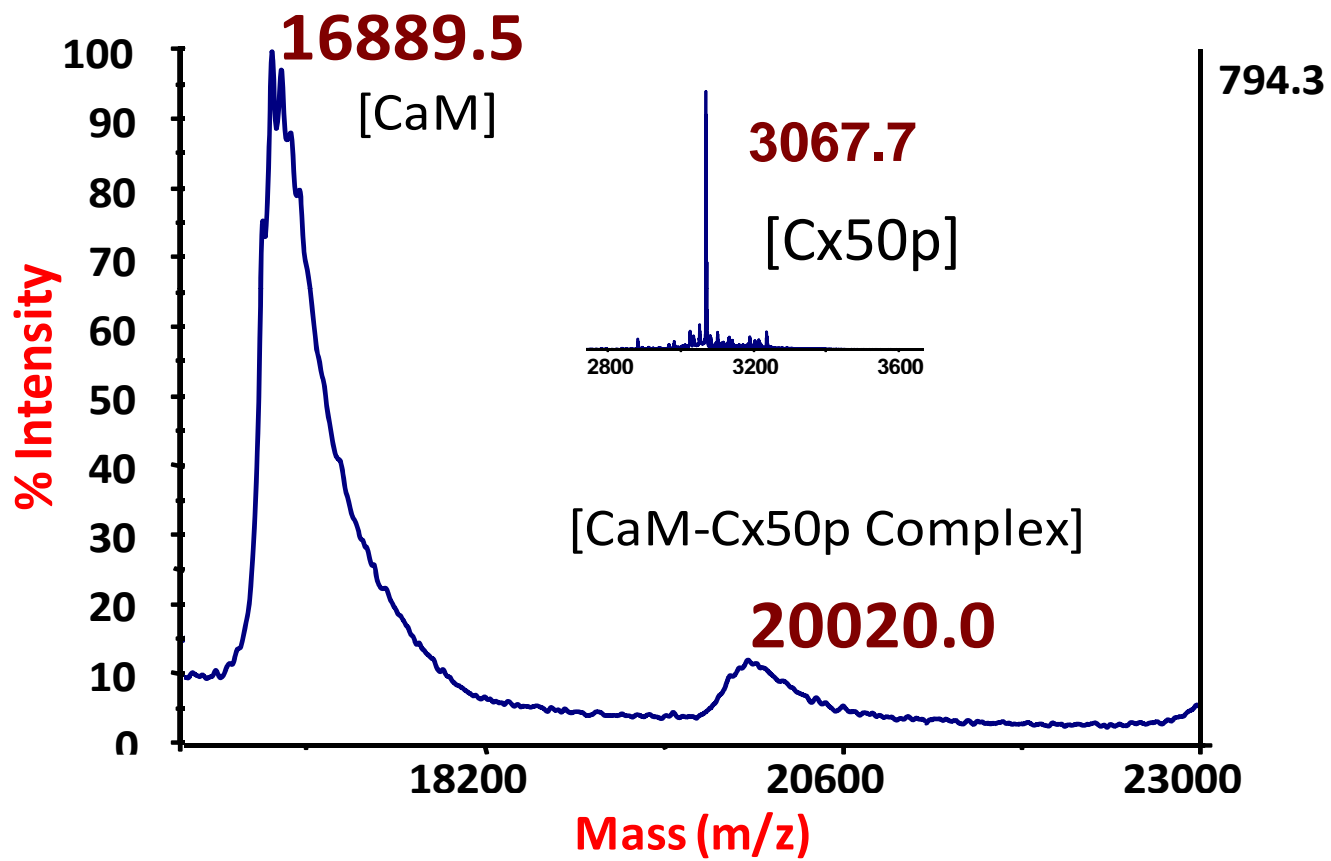

Figure S2

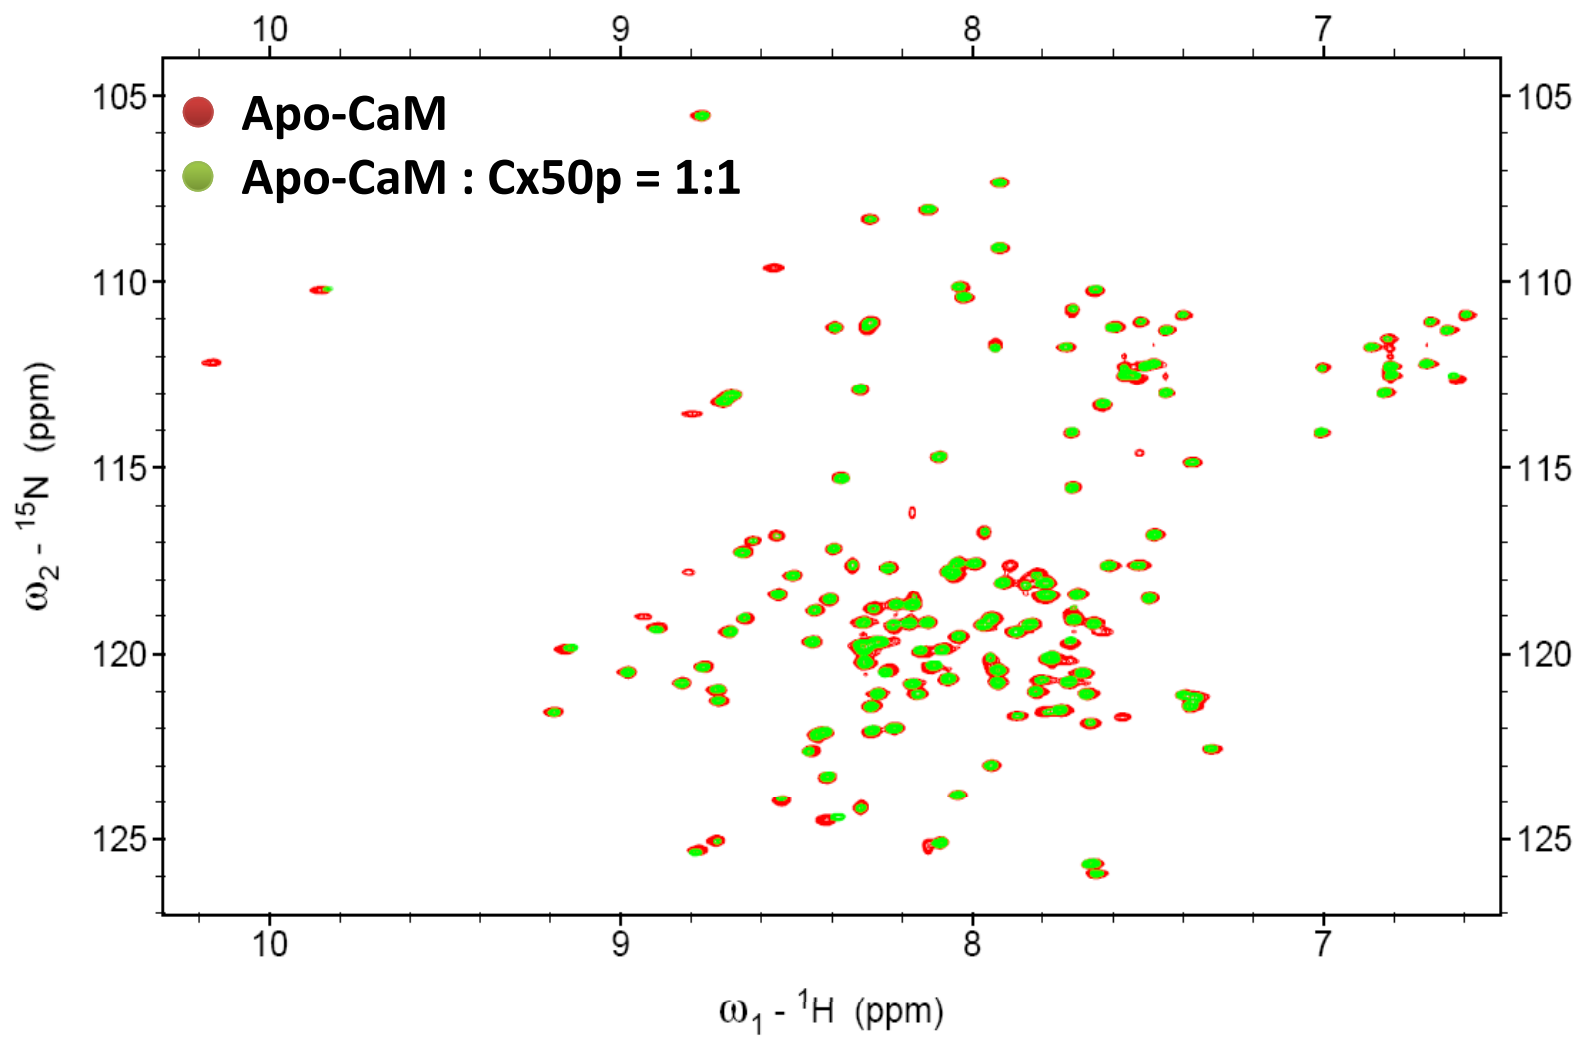

Figure S3

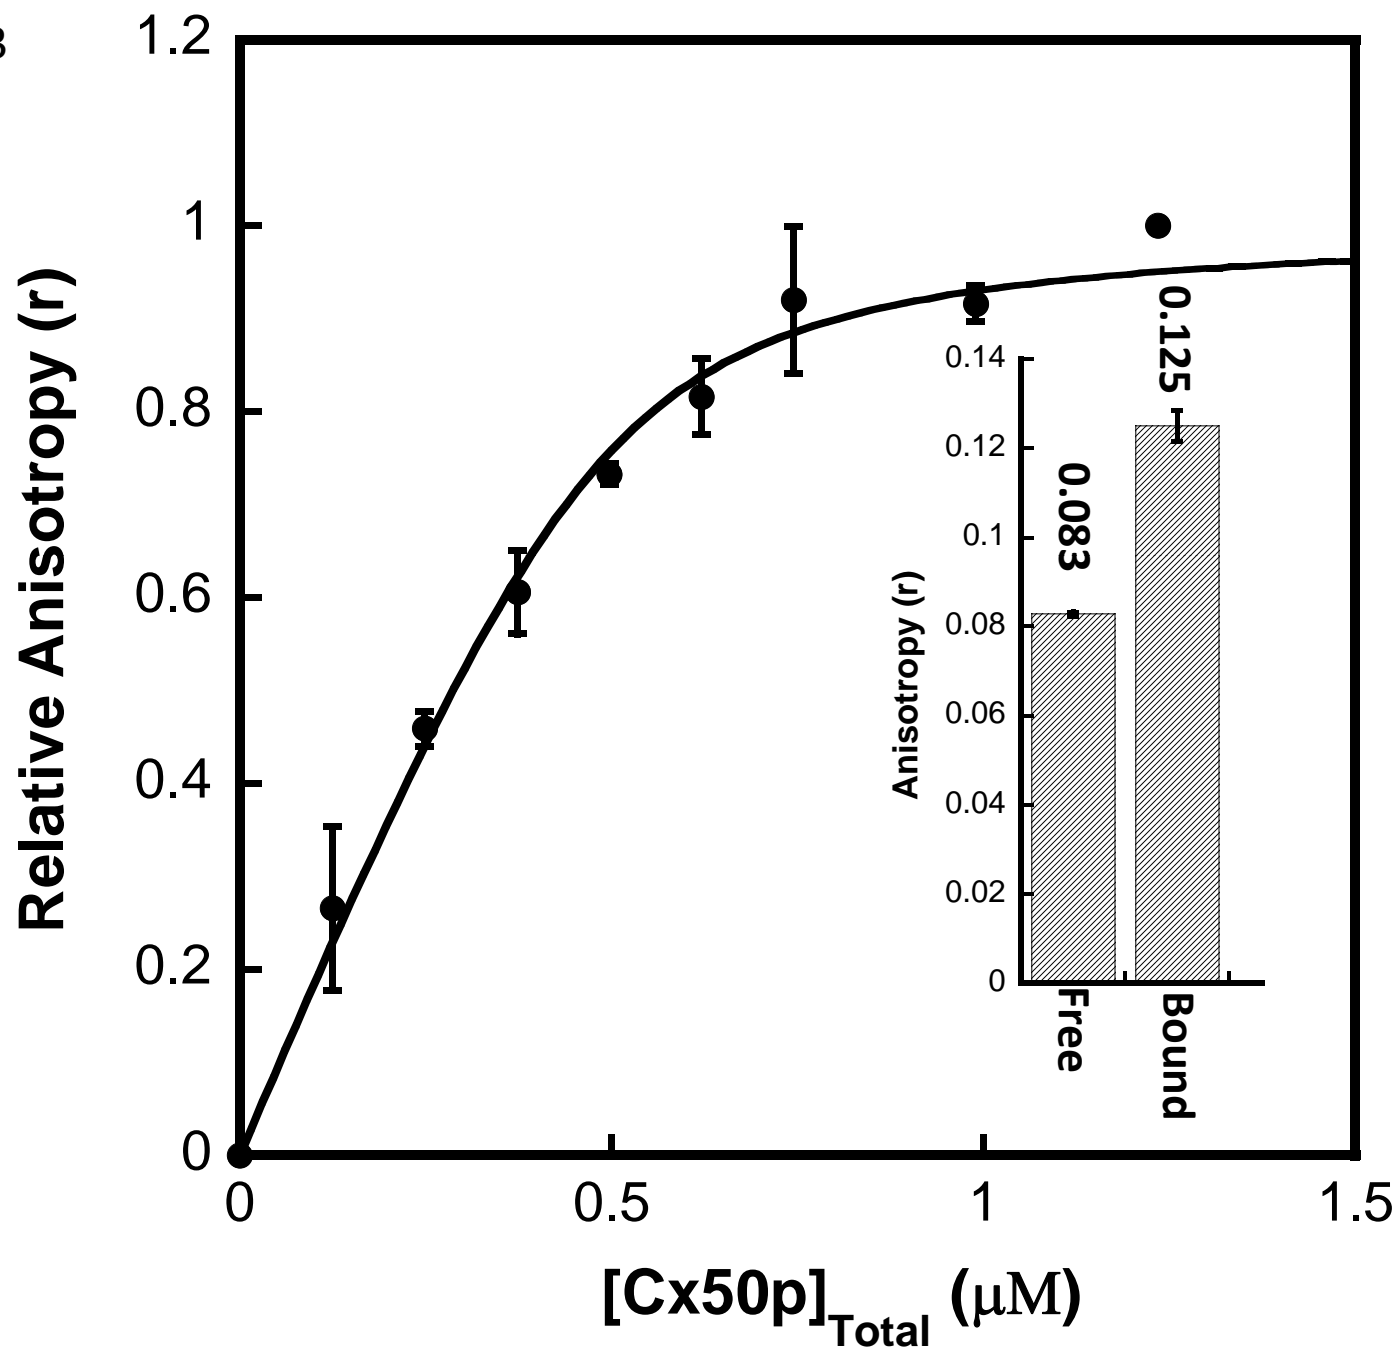

Figure S4

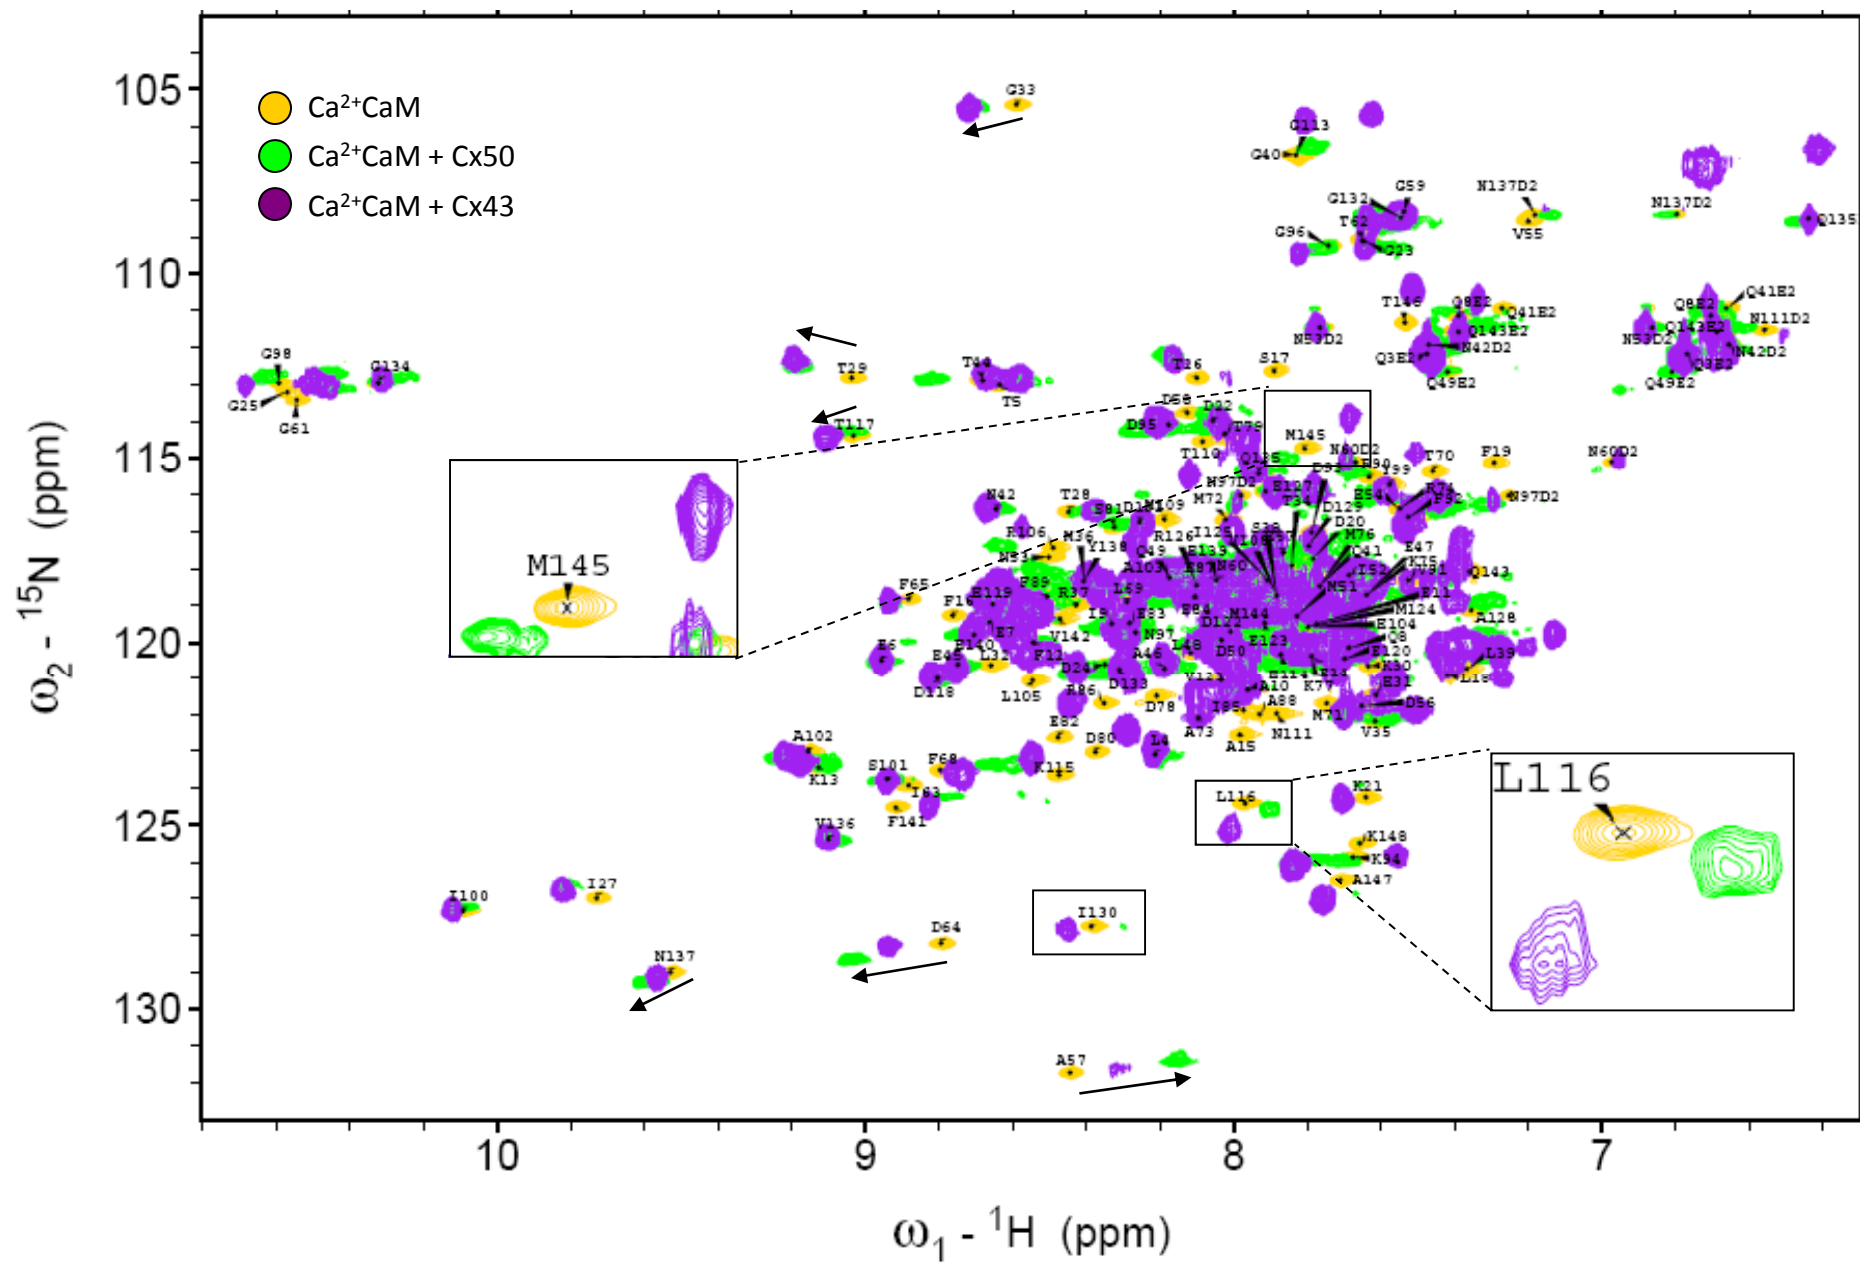

Supplement: NIHMS375165-supplement-supplement.pdf [file NIHMS375165-supplement-supplement.pdf]
